# Supplementary material
Source: ML conference proceedings conference paper supplement (https://proceedings.neurips.cc/paper_files/paper/2012/hash/5fd0b37cd7dbbb00f97ba6ce92bf5add-Abstract.html)
Supplement: Supplementary file [file 5fd0b37cd7dbbb00f97ba6ce92bf5add-Supplemental.zip]

# Supplementary material for “Coding efficiency and detectability of rate fluctuations with non-Poisson neuronal firing”

Shinsuke Koyama  
 Department of Statistical Modeling  
 The Institute of Statistical Mathematics  
 10-3 Midori-cho, Tachikawa, Tokyo 190-8562, Japan  
 skoyama@ism.ac.jp

In this supplementary material, we derive the KL divergence of the IG distribution (14) and lognormal distribution (15), and the formula for the lower bound (21) in the main manuscript.

## S-1 Derivation of the KL divergence

### S-1.1 Inverse Gaussian distribution

Inserting Eq. (7) into equation Eq. (5) and assuming that the time scale of the rate fluctuation  $\lambda(t)$  is longer than the mean ISI, so that the firing rate in each ISI can be approximated to be constant, we obtain

$$D_{\kappa}(\lambda(t)||\mu) = \frac{1}{2} \lim_{n \rightarrow \infty} \frac{1}{t_n - t_0} \sum_{i=1}^n \left\{ -\log \lambda(t_i) - \frac{\kappa}{\Lambda(t_i) - \Lambda(t_{i-1})} + \frac{\kappa}{\mu(t_i - t_{i-1})} \right\} + \frac{\mu}{2} \log \mu. \quad (\text{S-1.1})$$

Each terms in Eq. (S-1.1) is evaluated as follows:

- i) By assuming a long time scale in which a serial correlation of spikes is negligible, the first term in rhs of Eq. (S-1.1) can be evaluated in the same way as (12):

$$\lim_{n \rightarrow \infty} \frac{1}{t_n - t_0} \sum_{i=1}^n \log \lambda(t_i) = \langle \lambda \log \lambda \rangle_{\lambda}. \quad (\text{S-1.2})$$

- ii) Under the assumption that the rate fluctuation has a long time scale, the second term in rhs of (S-1.1) becomes

$$\frac{1}{t_n - t_0} \sum_{i=1}^n \frac{1}{\Lambda(t_i) - \Lambda(t_{i-1})} = \frac{n}{t_n - t_0} \frac{1}{n} \sum_{i=1}^n \frac{1}{\lambda(t_i)(t_i - t_{i-1})}. \quad (\text{S-1.3})$$

In order to evaluate the rhs of the above equation, we use the fact that the expectation of  $1/(\lambda x)$  with respect to the inverse Gaussian distribution  $\lambda f_{\kappa}(\lambda x)$  is given by

$$\int_0^{\infty} \frac{1}{\lambda x} \lambda f_{\kappa}(\lambda x) dx = \frac{1}{\kappa} + 1. \quad (\text{S-1.4})$$

Note that this does not depend on  $\lambda$ . Thus, we obtain

$$\lim_{n \rightarrow \infty} \frac{n}{t_n - t_0} \frac{1}{n} \sum_{i=1}^n \frac{1}{\lambda(t_i)(t_i - t_{i-1})} = \mu \left( \frac{1}{\kappa} + 1 \right). \quad (\text{S-1.5})$$

- iii) To evaluate the third term in rhs of Eq. (S-1.1), let  $\{t_i^{(\lambda)} - t_{i-1}^{(\lambda)}\}$  be a set of ISIs that are generated with the rate  $\lambda$ , and  $n_\lambda$  be the number of the ISIs included in this set. Using Eq. (S-1.4), we obtain

$$\frac{1}{n_\lambda} \sum_{i=1}^{n_\lambda} \frac{1}{t_i^{(\lambda)} - t_{i-1}^{(\lambda)}} \rightarrow \lambda \left( \frac{1}{\kappa} + 1 \right), \quad \text{as } n_\lambda \rightarrow \infty. \quad (\text{S-1.6})$$

On the other hand, the ratio of  $n_\lambda$  to  $n$  converges to

$$\frac{n_\lambda}{n} \rightarrow \frac{\lambda p(\lambda) d\lambda}{\mu}, \quad \text{as } n \rightarrow \infty, \quad (\text{S-1.7})$$

from the law of large number. Using Eqs. (S-1.6) and (S-1.7), we obtain

$$\frac{1}{n} \sum_{i=1}^n \frac{1}{t_i - t_{i-1}} \rightarrow \frac{1}{\mu} \left( \frac{1}{\kappa} + 1 \right) \int_0^\infty \lambda^2 p(\lambda) d\lambda = \left( \frac{1}{\kappa} + 1 \right) \left( \mu + \frac{\langle (\lambda - \mu)^2 \rangle_\lambda}{\mu} \right), \quad \text{as } n \rightarrow \infty. \quad (\text{S-1.8})$$

Substituting Eqs. (S-1.2), (S-1.5) and (S-1.8) into Eq. (S-1.1), the KL divergence for IG distribution is obtained as

$$D_\kappa(\lambda(t) || \mu) = \frac{\mu}{2} \log \mu - \frac{1}{2} \langle \lambda \log \lambda \rangle_\lambda + \frac{\kappa + 1}{2\mu} \langle (\lambda - \mu)^2 \rangle_\lambda. \quad (\text{S-1.9})$$

## S-1.2 Lognormal distribution

Substituting Eq. (8) into Eq. (5), and using the same approximation leads to

$$\begin{aligned} D_\kappa(\lambda(t) || \mu) &= \frac{\mu}{2} \log \mu + \frac{\mu}{2\kappa} (\log \mu)^2 + \frac{\log \mu}{\kappa} \lim_{n \rightarrow \infty} \frac{1}{t_n - t_0} \sum_{i=1}^n \log(t_i - t_{i-1}) \\ &\quad - \lim_{n \rightarrow \infty} \frac{1}{t_n - t_0} \sum_{i=1}^n \left[ \frac{1}{2} \log \lambda(t_i) + \frac{1}{2\kappa} \{\log \lambda(t_i)\}^2 + \frac{1}{\kappa} \log \lambda(t_i) \cdot \log(t_i - t_{i-1}) \right] \end{aligned} \quad (\text{S-1.10})$$

Each term in Eq. (S-1.10) is evaluated as follows:

- i) In the same way as Eq. (12), we obtain

$$\lim_{n \rightarrow \infty} \frac{1}{t_n - t_0} \sum_{i=1}^n \log \lambda(t_i) = \langle \lambda \log \lambda \rangle_\lambda, \quad (\text{S-1.11})$$

and

$$\lim_{n \rightarrow \infty} \frac{1}{t_n - t_0} \sum_{i=1}^n \{\log \lambda(t_i)\}^2 = \langle \lambda (\log \lambda)^2 \rangle_\lambda. \quad (\text{S-1.12})$$

- ii) Using the fact that the expectation of  $\log x$  with respect to the lognormal distribution  $\lambda f_\kappa(\lambda x)$  is given by  $-\log \lambda - \frac{\kappa}{2}$ , and the same argument as the inverse IG distribution

(i.e., using Eq. (S-1.7)), we obtain

$$\begin{aligned}
& \lim_{n \rightarrow \infty} \frac{1}{t_n - t_0} \sum_{i=1}^n \log(t_i - t_{i-1}) \\
&= \lim_{n \rightarrow \infty} \frac{n}{t_n - t_0} \frac{1}{n} \sum_{i=1}^n \log(t_i - t_{i-1}) \\
&= \int_0^\infty \left( -\log \lambda - \frac{\kappa}{2} \right) \lambda p(\lambda) d\lambda,
\end{aligned} \tag{S-1.13}$$

and

$$\begin{aligned}
& \lim_{n \rightarrow \infty} \frac{1}{t_n - t_0} \sum_{i=1}^n \log \lambda(t_i) \cdot \log(t_i - t_{i-1}) \\
&= \lim_{n \rightarrow \infty} \frac{n}{t_n - t_0} \frac{1}{n} \sum_{i=1}^n \log \lambda(t_i) \cdot \log(t_i - t_{i-1}) \\
&= \int_0^\infty \log \lambda \left( -\log \lambda - \frac{\kappa}{2} \right) \lambda p(\lambda) d\lambda.
\end{aligned} \tag{S-1.14}$$

Substituting Eqs. (S-1.11)-(S-1.14) into Eq. (S-1.10), the KL divergence for the lognormal distribution is obtained as

$$D_\kappa(\lambda(t) || \mu) = \frac{\mu}{2\kappa} (\log \mu)^2 - \frac{\log \mu}{\kappa} \langle \lambda \log \lambda \rangle_\lambda + \frac{1}{2\kappa} \langle \lambda (\log \lambda)^2 \rangle_\lambda. \tag{S-1.15}$$

## S-2 Derivation of the formula for the lower bound

Here, we derive the formula (21) in the main manuscript. In this derivation, we assume the following conditions for asymptotic analysis:

- (A) The time scale of the rate fluctuation is longer than the mean ISI, so that the serial correlation of spikes are negligible.
- (B) The amplitude of rate fluctuation relative to the mean rate is small.
- (C) A large observation interval  $T \gg 1$ .

### S-2.1 Formulation of the empirical Bayes method

Here, we briefly summarize the empirical Bayes method. We suppose that a spike train  $\{t_i\} := \{t_1, t_2, \dots, t_n\}$  in the interval  $[0, T]$  is derived from the time-rescaled renewal process with the gamma ISI distribution, whose firing rate and the shape parameter are given by  $\lambda(t)$  and  $\kappa$ , respectively. We also suppose that the firing rate is given by the form:

$$\lambda(t) = e^{x(t)} = \mu + \sigma f(t),$$

where  $\mu$  is the mean firing rate, and  $f(t)$  represent the rate fluctuation such that  $\langle f(t) \rangle = 0$  and  $\langle f(t)f(t') \rangle = \phi(t - t')$ .  $x(t) \in \mathbb{R}$  denotes the latent process.

From the given spike train  $\{t_i\}$ , we wish to evaluate the marginal likelihood function:

$$p_{\nu, \gamma}(\{t_i\}) = \int p_\nu(\{t_i\} | \{x(t)\}) p_\gamma(\{x(t)\}) \mathcal{D}\{x(t)\}, \tag{S-2.1}$$

where

$$p_\nu(\{t_i\} | \{x(t)\}) = \prod_{i=1}^n \lambda(t_i) f_\nu(\Lambda(t_i) - \Lambda(t_{i-1})), \quad f_\nu(y) = \nu^\nu y^{\nu-1} e^{-\nu y} / \Gamma(\nu), \tag{S-2.2}$$

is the likelihood function of the time-rescaled renewal process with the gamma ISI distribution, and

$$p_\gamma(\{x(t)\}) = \frac{1}{Z(\gamma)} \exp \left[ -\frac{1}{2\gamma^2} \int_0^T \left( \frac{dx(t)}{dt} \right)^2 dt \right]$$

is the prior distribution of  $x(t)$ .  $Z(\gamma)$  is the normalization constant given by

$$Z(\gamma) = \frac{1}{\sqrt{2\pi\gamma^2 T}} \exp \left[ -\frac{\{x(T) - x(0)\}^2}{2\gamma^2 T} \right].$$

Then, the estimators for  $\kappa$  and  $\gamma$  are obtained by maximizing the marginal likelihood:

$$(\hat{\kappa}, \hat{\gamma}) = \arg \max_{\nu, \gamma} p_{\nu, \gamma}(\{t_i\}).$$

## S-2.2 Evaluation of the marginal likelihood

The log of likelihood function (S-2.2) is explicitly given by

$$\begin{aligned} \log p_\nu(\{t_i\}|\{x(t)\}) &= \sum_i [x(t_i) + \nu \log \nu + (\nu - 1) \log(\Lambda(t_i) - \Lambda(t_{i-1})) \\ &\quad - \nu(\Lambda(t_i) - \Lambda(t_{i-1})) - \log \Gamma(\nu)] \\ &= \sum_i [x(t_i) + (\nu - 1) \log(\Lambda(t_i) - \Lambda(t_{i-1}))] \\ &\quad + n\nu \log \nu - \nu \int_0^T e^{x(t)} dt - n \log \Gamma(\nu). \end{aligned}$$

From the condition (A), the firing rate in each ISI can be approximated to be constant, and thus we obtain

$$\log(\Lambda(t_i) - \Lambda(t_{i-1})) \approx x(t_i) + \log(t_i - t_{i-1}).$$

Under this approximation, the log likelihood is rewritten as

$$\begin{aligned} \log p_\nu(\{t_i\}|\{x(t)\}) &= \sum_i [\nu x(t_i) + (\nu - 1) \log(t_i - t_{i-1})] \\ &\quad + n\nu \log \nu - \nu \int_0^T e^{x(t)} dt - n \log \Gamma(\nu). \end{aligned}$$

We decompose the state  $x(t)$  into the mean  $\log \mu$  and fluctuation  $y(t)$ , as

$$x(t) = \log \mu + y(t).$$

Accordingly, the log likelihood function is decomposed into two parts, as

$$\log p_\nu(\{t_i\}|\{x(t)\}) = \mathcal{H} + \mathcal{I}, \tag{S-2.3}$$

where  $\mathcal{H}$  represents the log likelihood function of the gamma distribution,

$$\mathcal{H} = -T\nu\mu + n\nu \log \mu + n\nu \log \nu - n \log \Gamma(\nu) + (\nu - 1) \sum_i \log(t_i - t_{i-1}), \tag{S-2.4}$$

whereas  $\mathcal{I}$  represents the contribution of rate fluctuation,

$$\mathcal{I} = \nu \int_0^T \left[ \sum_i \delta(t - t_i) y(t) - \mu(e^{y(t)} - 1) \right] dt.$$

Substituting Eq. (S-2.3) into Eq. (S-2.1), the marginal likelihood function is obtained as

$$p_{\nu,\gamma}(\{t_i\}) = e^{\mathcal{H}} \mathcal{F}.$$

The contribution of the rate fluctuation can be represented in the form of a path integral [2],

$$\mathcal{F} = \frac{1}{Z(\gamma)} \int \exp \left[ - \int_0^T L(y, \dot{y}) dt \right] \mathcal{D}\{y(t)\}, \quad (\text{S-2.5})$$

where  $L(\dot{x}, x)$  is a ‘‘Lagrangian’’ of the form,

$$L(y, \dot{y}) = \frac{1}{2\gamma^2} \dot{y}^2 + \nu\mu(e^y - 1) - \nu \sum_i \delta(t - t_i) y. \quad (\text{S-2.6})$$

Using Eq. (12) the Lagrangian (S-2.6) is represented as

$$L(y, \dot{y}) = \frac{1}{2\gamma^2} \dot{y}^2 + \nu\mu(e^y - 1) - \nu \left[ \lambda(t) + \sqrt{\lambda(t)/\kappa\xi(t)} \right] y.$$

Under the condition (B), we can take the terms up to second-order with respect to  $y$ , and the Lagrangian is approximated to

$$L(y, \dot{y}) = \frac{1}{2\gamma^2} \dot{y}^2 + \frac{\nu\mu}{2} y^2 - \nu \left[ \sigma f(t) + \sqrt{\lambda(t)/\kappa\xi(t)} \right] y. \quad (\text{S-2.7})$$

Note that this approximation is valid in  $O((\sigma/\mu)^{3/2})$ .

The MAP estimate  $\hat{y}$  is obtained by solving the Euler-Lagrange equation,

$$\frac{d}{dt} \left( \frac{\partial L}{\partial \dot{y}} \right) - \frac{\partial L}{\partial y} = 0.$$

The Euler-Lagrange equation associated with Eq. (S-2.7) is obtained as

$$\frac{1}{\gamma^2} \ddot{y} - \nu\mu\hat{y} + \nu \left[ \lambda(t) - \mu + \sqrt{\lambda(t)/\kappa\xi(t)} \right] = 0. \quad (\text{S-2.8})$$

By decomposing  $y(t) = \hat{y}(t) + \phi(t)$  and approximate the path integral (S-2.5) to the range quadratic with respect to  $\phi(t)$ , the marginal likelihood function can be evaluated as

$$p_{\nu,\gamma}(\{t_i\}) = \frac{e^{\mathcal{H}}}{Z(\gamma)} R \exp \left[ - \int_0^T L(\hat{y}, \dot{\hat{y}}) dt \right], \quad (\text{S-2.9})$$

where  $R$  is the fluctuation factor:

$$R = \int \exp \left[ - \int_0^T \left( \frac{1}{2\gamma^2} \dot{\phi}^2 + \frac{\nu\mu}{2} \phi^2 \right) dt \right] \mathcal{D}\{\phi(t)\}. \quad (\text{S-2.10})$$

In the following, we evaluate the three factors in Eq. (S-2.9).

### Contribution of the MAP path

First, we evaluate the factor  $\exp[-\int_0^T L(\hat{y}, \dot{\hat{y}}) dt]$  in Eq. (S-2.9). The MAP path is obtained by solving Eq. (S-2.8) as

$$\hat{y}(t) = \frac{\gamma}{2} \sqrt{\frac{\nu}{\mu}} \int_0^T e^{-\gamma\sqrt{\nu\mu}|t-s|} \left[ \sigma f(s) + \sqrt{\lambda(s)/\kappa\xi(s)} \right] ds. \quad (\text{S-2.11})$$

By using Eqs. (S-2.7) and (S-2.8), we obtain

$$\frac{1}{T} \int_0^T L(\hat{y}, \dot{\hat{y}}) dt = \int_0^T \left[ \frac{1}{2\gamma^2} \frac{d}{dt} (\hat{y} \dot{\hat{y}}) - \frac{\nu}{2} \{ \sigma f(t) + \sqrt{\lambda(t)/\kappa\xi(t)} \} \hat{y} \right] dt.$$

For  $T \gg 1$ , the boundary effect is negligible so that the first-term in the rhs of the above equation vanishes. Substituting the MAP path (S-2.11) into the above equation leads to

$$\frac{1}{T} \int_0^T L(\hat{y}, \dot{y}) dt = -\frac{\gamma\sqrt{\nu\mu}}{4} \left\{ \frac{\nu}{\kappa} + \frac{2\nu\sigma^2}{\mu} \int_0^\infty \phi(u) e^{-\gamma\sqrt{\nu\mu}u} du \right\}, \quad (\text{S-2.12})$$

for  $T \rightarrow \infty$ .

### Fluctuation factor

Next, we evaluate the fluctuation factor (S-2.10). This factor can be represented by the ratio of determinants [1]:

$$R = \frac{1}{\sqrt{2\pi\gamma^2 T}} \left[ \frac{\det(-\partial_t^2 + \nu\mu\gamma^2)}{\det(-\partial_t^2)} \right]^{-\frac{1}{2}} = \frac{1}{\sqrt{2\pi\gamma^2 T}} \left[ \frac{\varphi_1(T)}{\varphi_2(T)} \right]^{-\frac{1}{2}},$$

which can be computed by solving the associated differential equations:

$$\begin{aligned} (-\partial_t^2 + \nu\mu\gamma^2)\varphi_1(t) &= 0, & \varphi_1(0) &= 0, & \dot{\varphi}_1(0) &= 1, \\ -\partial_t^2\varphi_2(t) &= 0, & \varphi_2(0) &= 0, & \dot{\varphi}_2(0) &= 1. \end{aligned}$$

The above differential equations are solved as

$$\varphi_1(t) = \frac{1}{2\gamma\sqrt{\nu\mu}} \left\{ e^{\gamma\sqrt{\nu\mu}t} - e^{-\gamma\sqrt{\nu\mu}t} \right\}, \quad \varphi_2(t) = t,$$

from which the fluctuation factor is obtained as

$$\frac{1}{T} \log R = -\frac{\gamma\sqrt{\nu\mu}}{2}, \quad (\text{S-2.13})$$

for  $T \rightarrow \infty$ .

### Log likelihood of gamma distribution

In order to evaluate the log likelihood function of the gamma distribution (S-2.4), we need to evaluate  $\frac{1}{n} \sum_i \log(t_i - t_{i-1})$ . Let  $\{t_i^{(\lambda)} - t_{i-1}^{(\lambda)}\}$  be a set of ISIs in the whole ISIs  $\{t_i - t_{i-1}\}$  derived from the gamma distribution with the rate  $\lambda$ , and  $n_\lambda$  be the number of the ISIs in this set. Then, we obtain

$$\frac{1}{n_\lambda} \sum_{i=1}^{n_\lambda} \log(t_i^{(\lambda)} - t_{i-1}^{(\lambda)}) \rightarrow \psi(\kappa) - \log \kappa - \log \lambda, \quad \text{as } n_\lambda \rightarrow \infty,$$

where  $\psi(\kappa) = \frac{d}{d\kappa} \log \Gamma(\kappa)$  is the digamma function. On the other hand,  $n_\lambda/n$  converges to

$$\frac{n_\lambda}{n} \rightarrow \frac{\lambda p(\lambda) d\lambda}{\mu}, \quad \text{as } n \rightarrow \infty,$$

from the law of large number. Using these, we obtain

$$\lim_{n \rightarrow \infty} \frac{1}{n} \sum_{i=1}^n \log(t_i - t_{i-1}) = \int_0^\infty [\psi(\kappa) - \log \kappa - \log \lambda] \frac{\lambda p(\lambda)}{\mu} d\lambda.$$

By using the condition (B) and expanding up to the second-order with respect to  $\sigma/\mu$ , the above equation can be evaluated as

$$\psi(\kappa) - \log \kappa - \log \mu - \frac{\sigma^2}{2\mu^2} \int_{-\infty}^\infty f^2 p(f) df = \psi(\kappa) - \log \kappa - \log \mu - \frac{\sigma^2 \phi(0)}{2\mu^2}. \quad (\text{S-2.14})$$

Substituting (S-2.14) into Eq.(S-2.4), the log likelihood of the gamma distribution is obtained as

$$\frac{1}{T} \mathcal{H} = \mu \left\{ \log \mu - \nu + \nu \log \nu - \log \Gamma(\nu) + (\nu - 1) \left[ \psi(\kappa) - \log \kappa - \frac{\sigma^2 \phi(0)}{2\mu^2} \right] \right\}. \quad (\text{S-2.15})$$

### Log marginal likelihood function

Summing the contribution of the MAP path (S-2.12), fluctuation factor (S-2.13) and the likelihood function (S-2.15), the log marginal likelihood function is written as

$$\begin{aligned}
\mathcal{L}(\gamma, \nu) &:= \frac{1}{T} \log p_{\nu, \gamma}(\{t_i\}) = \frac{1}{T} \left( \log R - \log Z(\gamma) - \int_0^T L(\dot{\hat{y}}, \hat{y}) dt + \mathcal{H} \right) \\
&= -\frac{\gamma\sqrt{\nu\mu}}{4} \left\{ 2 - \frac{\nu}{\kappa} \left( 1 + \frac{2\kappa\sigma^2}{\mu} \int_0^\infty \phi(u) e^{-\gamma\sqrt{\nu\mu}u} du \right) \right\} \\
&\quad + \sqrt{\mu\sigma} \left\{ \left( \log \mu - \nu + \nu \log \nu - \log \Gamma(\nu) + (\nu - 1)[\psi(\kappa) - \log \kappa] \right) \left( \frac{\sigma}{\mu} \right)^{\frac{1}{2}} \right. \\
&\quad \left. - \frac{(\nu - 1)\phi(0)}{2} \left( \frac{\sigma}{\mu} \right)^{\frac{3}{2}} \right\}, \tag{S-2.16}
\end{aligned}$$

in the limit of  $T \rightarrow \infty$ . Note that Eq. (S-2.16) is valid in  $O((\sigma/\mu)^{3/2})$ .

### S-2.3 Lower bound

In the range of parameter space  $(\gamma, \nu)$  that is valid for the asymptotic analysis (in which  $o((\sigma/\mu)^{3/2})$  is negligible), the log marginal likelihood function can have a maximum at  $(\gamma, \nu) = (0, \hat{\kappa}_0)$  or at  $(\hat{\gamma}, \hat{\kappa})$ ,  $\hat{\gamma} > 0$ , which correspond to constant and fluctuating rate estimations, respectively.

For the case of  $\gamma = 0$ , the fluctuation in the rate estimation (S-2.11) vanishes, and thus the rate estimation becomes constant  $\hat{\lambda}(t) = \mu$ . Taking  $\partial \mathcal{L} / \partial \nu = 0$  leads to

$$\psi(\hat{\kappa}_0) - \log \hat{\kappa}_0 - \left[ \psi(\kappa) - \log \kappa - \frac{\sigma^2 \phi(0)}{2\mu^2} \right] = 0.$$

The solution of the above equation is obtained as

$$\hat{\kappa}_0 = \kappa - \frac{\sigma^2 \phi(0)}{2\mu^2 I(\kappa)} + o((\sigma/\mu)^2), \tag{S-2.17}$$

where  $I(\kappa) = \dot{\psi}(\kappa) - 1/\kappa$  is the Fisher information of the gamma distribution.

We next evaluate the fluctuating rate estimation if it exists. From (S-2.17),  $\hat{\kappa}$  must be  $\kappa + O((\sigma/\mu)^2)$ , and the log marginal likelihood function becomes

$$\begin{aligned}
\mathcal{L}(\gamma, \hat{\kappa}) &= \mathcal{L}(\gamma, \kappa) \\
&= -\frac{\eta}{4} \left[ 1 - 2 \frac{\kappa\sigma^2}{\mu} \int_0^\infty \phi(u) e^{-\eta u} du \right] + \mathcal{L}(0, \hat{\kappa}_0), \tag{S-2.18}
\end{aligned}$$

in  $O((\sigma/\mu)^{3/2})$ , where  $\eta := \gamma\sqrt{\kappa\mu}$ .  $\mathcal{L}(\gamma, \hat{\kappa})$  satisfies  $\mathcal{L}(0, \hat{\kappa}) = 0$  and  $\mathcal{L}(\infty, \hat{\kappa}) = -\infty$ , and has the global maximum either at  $\gamma = \hat{\gamma} > 0$  or  $\gamma = 0$ , depending on the value of  $\kappa\sigma^2/\mu$ .  $\mathcal{L}(\gamma, \hat{\kappa})$  has the global maximum at  $\gamma = \hat{\gamma} > 0$  if  $\kappa\sigma^2/\mu$  exceeds the critical value:

$$\frac{1}{2 \max_\eta \int_0^\infty \phi(u) e^{-\eta u} du}. \tag{S-2.19}$$

On the other hand, from Eq. (14), the KL divergence of the time-rescaled gamma renewal process with the rate  $\lambda(t) = \mu + \sigma f(t)$  is obtained as

$$D_\kappa(\lambda(t) || \mu) = \frac{\kappa\sigma^2}{2\mu} \phi(0) + o((\sigma/\mu)^{3/2}). \tag{S-2.20}$$

From eqn. (S-2.19) and (S-2.20), we obtain the formula (22) that the critical point satisfies as

$$D_\kappa(\lambda(t) || \mu) = \frac{\phi(0)}{4 \max_\eta \int_0^\infty \phi(u) e^{-\eta u} du}. \tag{S-2.21}$$

## References

- [1] S. Coleman. *Aspects of Symmetry*. Cambridge University Press, 1988.
- [2] R. P. Feynman and A. R. Hibbs. *Quantum Mechanics and Path Integrals*. McGraw-Hill, 1965.
